# Supplementary material for: Selection of optimal molecular targets for tumor-specific imaging in pancreatic ductal adenocarcinoma
Source: Oncotarget. 2017 May 26;8(34):56816–28. doi: 10.18632/oncotarget.18232 (PMC5593604; doi:10.18632/oncotarget.18232)
Supplement: Supplementary file 1 [file oncotarget-08-56816-s001.pdf]

## Selection of optimal molecular targets for tumor-specific imaging in pancreatic ductal adenocarcinoma

### SUPPLEMENTARY INFORMATION

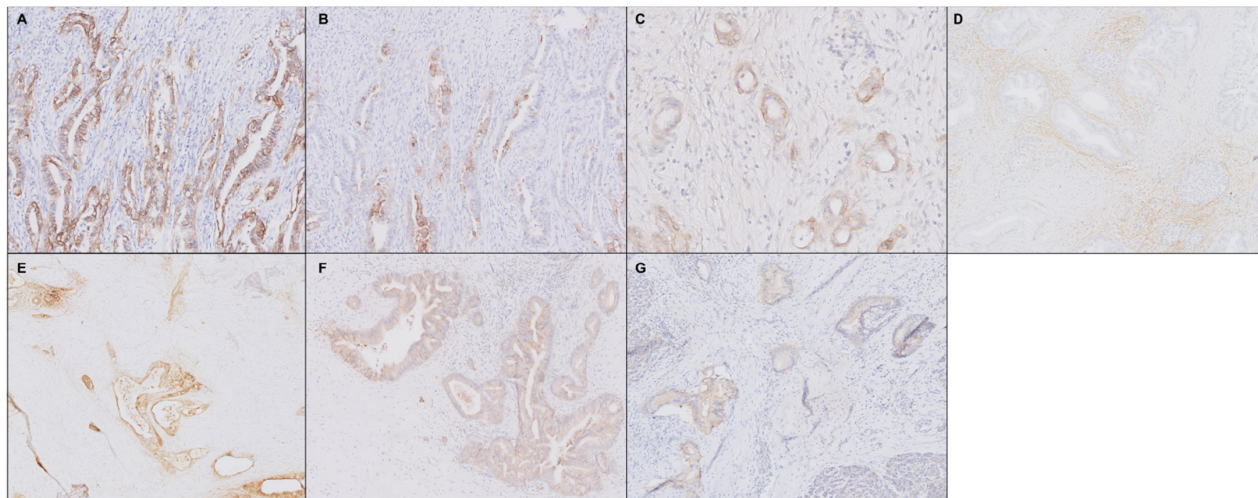

**Supplementary Figure 1: Tumor heterogeneity.** Representative image of PDAC staining patterns of  $\alpha v \beta 6$  (A) and CEACAM5 (B), showing a more heterogeneous staining pattern in CEACAM5 compared to  $\alpha v \beta 6$ . (10x objective).

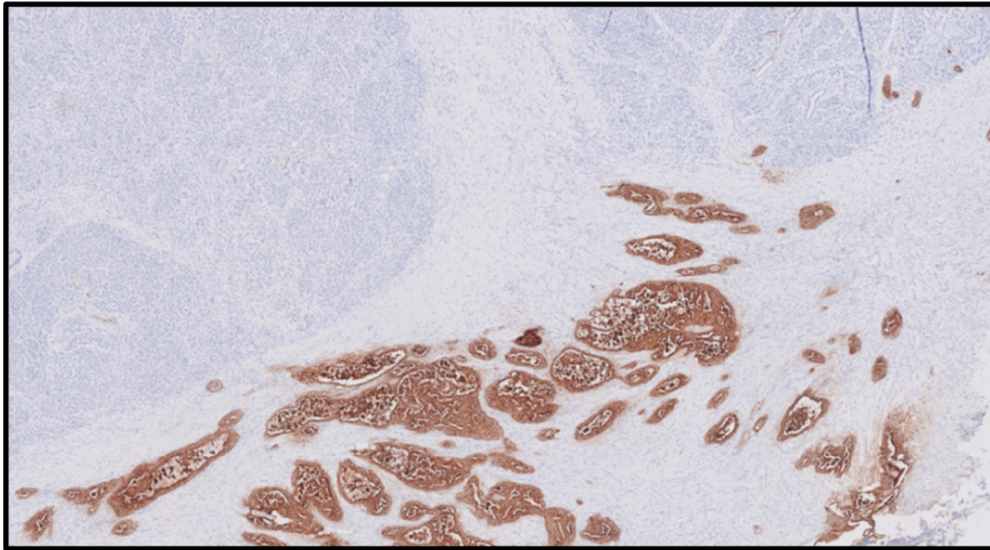

**Supplementary Figure 2: Characteristic staining pattern CEACAM5.** Absent CEACAM5 staining in normal pancreatic tissue even when adjacent to PDAC tissue (5x objective).

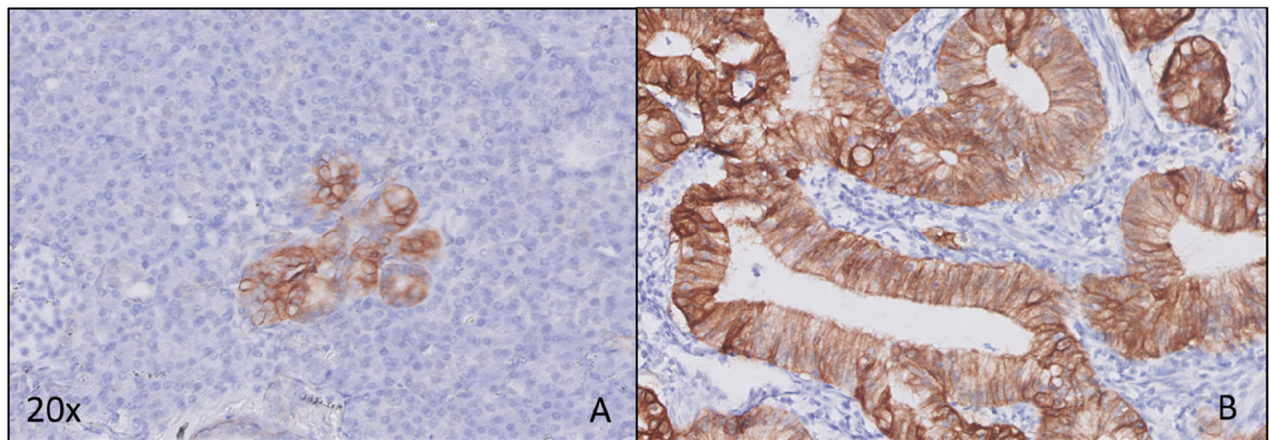

**Supplementary Figure 3: Ductal staining pattern in normal pancreatic tissue versus PDAC.** Representative image showing the difference in ductal  $\alpha v \beta 6$  staining in normal tissue (A) and PDAC (B), (20x objective).

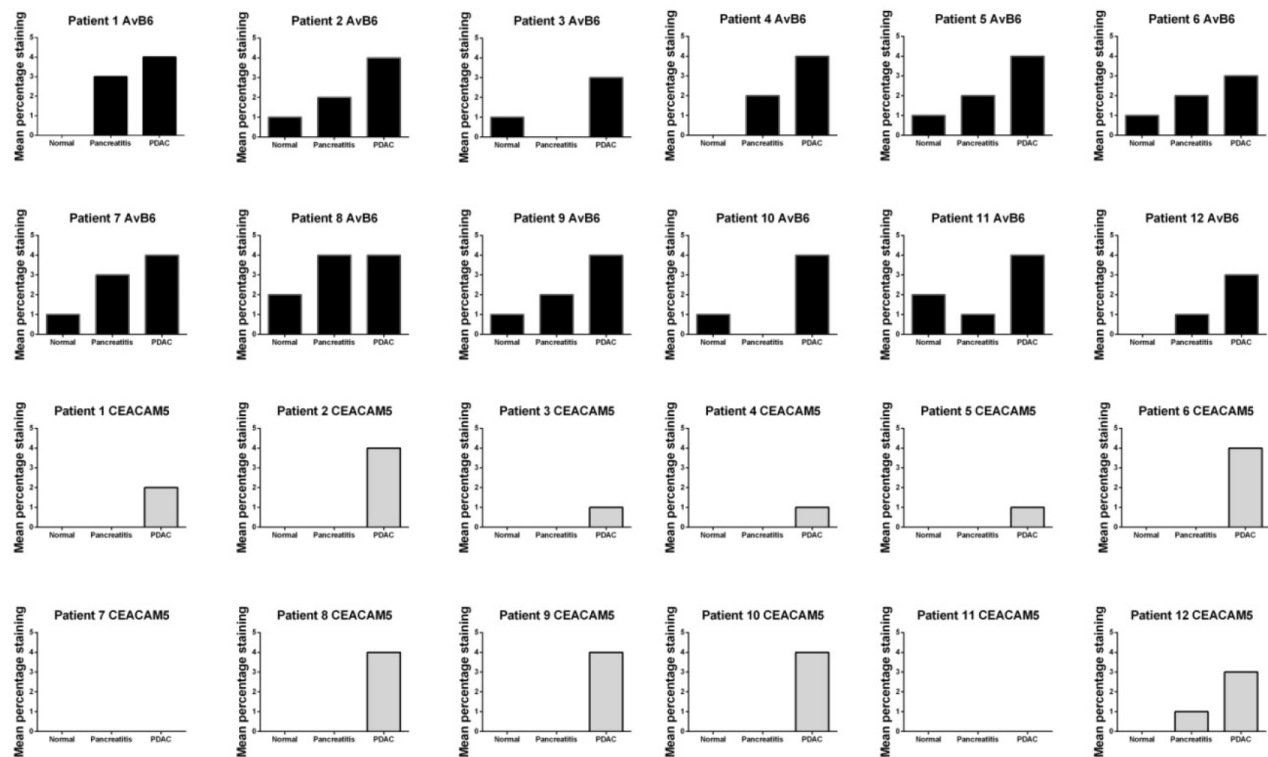

**Supplementary Figure 4: Expression in validation cohort.** Expression of  $\alpha v\beta 6$  and CEACAM5 within one patient in our validation cohort (n=12). The bars represent from left to right staining in normal pancreatic tissue, pancreatitis and PDAC respectively visualized per patient. For CEACAM5 there was no expression in normal pancreatic tissue and pancreatitis.

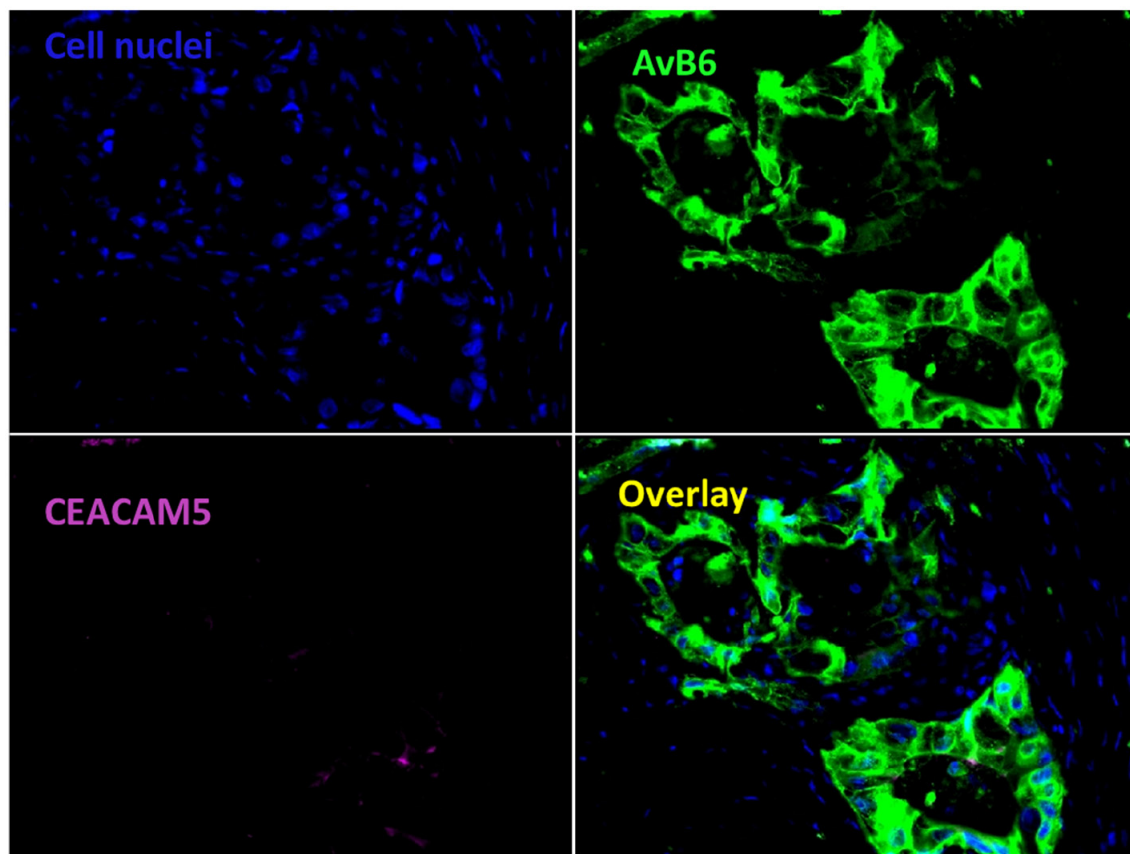

**Supplementary Figure 5: Value of multiplexing.** Immunofluorescent staining of  $\alpha v \beta 6$  and CEACAM5 in PDAC with a CEACAM5 negative PDAC sample. Using the double staining this tissue could be correctly identified as PDAC, however when there was only stained for CEACAM5, this spot would have been missed.

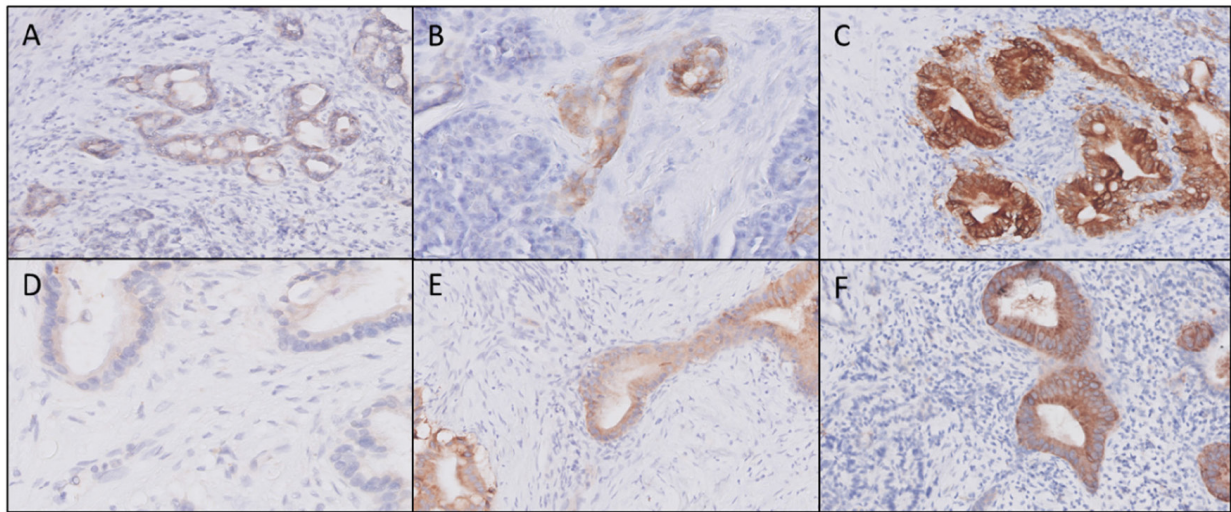

**Supplementary Figure 6: Staining intensity.** Representative images for each of the staining categories, divided by cell membrane (A-C) or cytoplasm staining (D-F) depending on the target of interest. Staining intensity was scored as 0=none, 1=weak (A and D), 2=moderate (B and E), 3=strong (C and F). (Objective 20x).

Supplementary Table 1: Patient characteristics of the patients with pancreatic adenocarcinoma, and/or pancreatitis included in this study

| Patient              | Gender | Age  | Tissue type                                  | Histologic grade PDAC     |
|----------------------|--------|------|----------------------------------------------|---------------------------|
| <i>First cohort</i>  |        |      |                                              |                           |
| 1                    | M      | 43.0 | Pancreatitis                                 | -                         |
| 2                    | M      | 64.8 | Pancreatitis                                 | -                         |
| 3                    | M      | 55.7 | Pancreatitis                                 | -                         |
| 4                    | V      | 53.4 | Pancreatitis                                 | -                         |
| 5                    | M      | 60.4 | Pancreatitis                                 | -                         |
| 6                    | V      | 52.9 | Pancreatitis                                 | -                         |
| 7                    | V      | 58.3 | Pancreatitis                                 | -                         |
| 8                    | V      | 76.1 | PDAC                                         | Moderately differentiated |
| 9                    | M      | 61.7 | PDAC                                         | Moderately differentiated |
| 10                   | M      | 71.9 | PDAC                                         | Poorly differentiated     |
| 11                   | V      | 42.9 | PDAC                                         | Well differentiated       |
| 12                   | M      | 67.4 | PDAC                                         | Poorly differentiated     |
| 13                   | M      | 72.2 | PDAC                                         | Moderately differentiated |
| 14                   | M      | 58.0 | PDAC                                         | Poorly differentiated     |
| 15                   | V      | 75.4 | PDAC                                         | Unknown                   |
| 16                   | M      | 76.4 | Normal pancreatic tissue                     | -                         |
| 17                   | M      | 71.9 | Normal pancreatic tissue                     | -                         |
| 18                   | M      | 72.2 | Normal pancreatic tissue                     | -                         |
| 19                   | M      | 43.2 | Normal pancreatic tissue                     | -                         |
| 20                   | M      | 43.0 | Normal pancreatic tissue                     | -                         |
| 21                   | M      | 70.0 | Normal pancreatic tissue                     | -                         |
| 22                   | M      | 70.0 | Normal pancreatic tissue                     | -                         |
| 23                   | V      | 79.0 | Normal pancreatic tissue                     | -                         |
| 24                   | V      | 57.0 | Normal pancreatic tissue                     | -                         |
| <i>Second cohort</i> |        |      |                                              |                           |
| 25                   | V      | 55.8 | PDAC, inflammation, normal pancreatic tissue | Moderately differentiated |
| 26                   | M      | 66.4 | PDAC, inflammation, normal pancreatic tissue | Unknown                   |
| 27                   | M      | 78.3 | PDAC, inflammation, normal pancreatic tissue | Unknown                   |
| 28                   | M      | 39.4 | PDAC, inflammation, normal pancreatic tissue | Moderately differentiated |
| 29                   | M      | 71.5 | PDAC, inflammation, normal pancreatic tissue | Moderately differentiated |
| 30                   | V      | 62.9 | PDAC, inflammation, normal pancreatic tissue | Moderately differentiated |
| 31                   | V      | 68.3 | PDAC, inflammation, normal pancreatic tissue | Poorly differentiated     |
| 32                   | M      | 62.3 | PDAC, inflammation, normal pancreatic tissue | Moderately differentiated |
| 33                   | M      | 58.7 | PDAC, inflammation, normal pancreatic tissue | Poorly differentiated     |
| 34                   | M      | 53.9 | PDAC, inflammation, normal pancreatic tissue | Well differentiated       |
| 35                   | M      | 61.3 | PDAC, inflammation, normal pancreatic tissue | Unknown                   |
| 36                   | V      | 64.9 | PDAC, inflammation, normal pancreatic tissue | Well differentiated       |

Supplementary Table 2: Antibodies and reagents used for immunohistochemistry and immunofluorescence

| Antibody                                            | IHC / IF | Catalog number          | Species | Monoclonal/<br>polyclonal | Concentration | Dilution  | Vendor                                                                              |
|-----------------------------------------------------|----------|-------------------------|---------|---------------------------|---------------|-----------|-------------------------------------------------------------------------------------|
| <i>Primary antibodies</i>                           |          |                         |         |                           |               |           |                                                                                     |
| <b>anti-<math>\alpha</math>v<math>\beta</math>6</b> | IHC / IF | 6.2A1                   | Mouse   | Monoclonal                | 0.5 mg/ml     | 1:800     | Biogen Idec MA Inc.,<br>Cambridge, MA, USA                                          |
| <b>anti-CEACAM5</b>                                 | IHC      | sc-23928/ CI-P83-1      | Mouse   | Monoclonal                | 0.2 mg/ml     | 1:1000    | Santa Cruz, CA, USA                                                                 |
| <b>anti-EGFR</b>                                    | IHC      | E30                     | Mouse   | Monoclonal                | 0.34 mg/ml    | 1:100     | Dako, Glostrup,<br>Denmark                                                          |
| <b>anti-CD90/<br/>Thy1</b>                          | IHC      | ab92574/<br>EPR3132     | Rabbit  | Monoclonal                | 0.07 mg/ml    | 1:800     | Abcam, Cambridge, UK                                                                |
| <b>anti-c-MET</b>                                   | IHC      | ab51067/<br>EP1454Y     | Rabbit  | Monoclonal                | 0.39 mg/ml    | 1:8000    | Abcam, Cambridge, UK                                                                |
| <b>anti-Cath E</b>                                  | IHC      | sc-6508 / C-20          | Goat    | Polyclonal                | 0.2 mg/ml     | 1:1000    | Santa Cruz, CA, USA                                                                 |
| <b>anti-uPAR</b>                                    | IHC      | ATN-617                 | Mouse   | Monoclonal                | 0.48 mg/ml    | 1:800     | Kindly provided by<br>Prof. A.P. Mazar,<br>Northwestern<br>University, Evanston, IL |
| <b>anti-CEACAM5</b>                                 | IF       | sc-59873/<br>26/5/1     | Mouse   | Monoclonal                | 0.2 mg/ml     | 1:1200    | Santa Cruz, CA, USA                                                                 |
| <i>Secondary antibodies</i>                         |          |                         |         |                           |               |           |                                                                                     |
| <b>HRP-labeled<br/>anti-mouse</b>                   | IHC      | K4001                   |         |                           | -             | Undiluted | Dako, Glostrup,<br>Denmark                                                          |
| <b>HRP-labeled<br/>anti-rabbit</b>                  | IHC      | K4003                   |         |                           | -             | Undiluted | Dako, Glostrup,<br>Denmark                                                          |
| <b>Anti-goat</b>                                    | IHC      | P0449                   |         |                           | 0.55 g/L      | 1:100     | Dako, Glostrup,<br>Denmark                                                          |
| <b>Anti-mouse</b>                                   | IF       | IgG1-AF488 /<br>A121121 | Goat    |                           | 2 mg/ml       | 1:200     | Life Technologies,<br>Thermo Fisher<br>Scientific, Waltham,<br>MA, USA              |
| <b>Anti-mouse</b>                                   | IF       | IgG2a-AF647 /<br>A21241 | Goat    |                           | 2 mg/ml       | 1:200     | Life Technologies,<br>Thermo Fisher<br>Scientific, Waltham,<br>MA, USA              |
